# Supplementary material for: Ambient catalyst-free oxidation reactions of aromatic amines using water radical cations
Source: Royal Society of Chemistry journal article supplement (doi:10.1039/d4sc04519j), 2024-01-01
Supplement: d4sc04519j1.pdf [file d4sc04519j1.pdf]

## Supporting Information

### **Ambient catalyst-free oxidation reactions of aromatic amines by water radical cations**

Xiaoping Zhang<sup>a,\*</sup>, Pinghua Hu<sup>a</sup>, Minmin Duan<sup>a</sup>, Konstantin Chingin<sup>b</sup>, Roman Balabin<sup>b</sup>, Xinglei Zhang<sup>a,\*</sup>, Huanwen Chen<sup>b,\*</sup>

<sup>a</sup>Jiangxi Key Laboratory for Mass Spectrometry and Instrumentation, East China University of Technology, Nanchang 330013, P. R. China

<sup>b</sup>School of Pharmacy, Jiangxi University of Chinese Medicine, Nanchang 330004, P. R. China

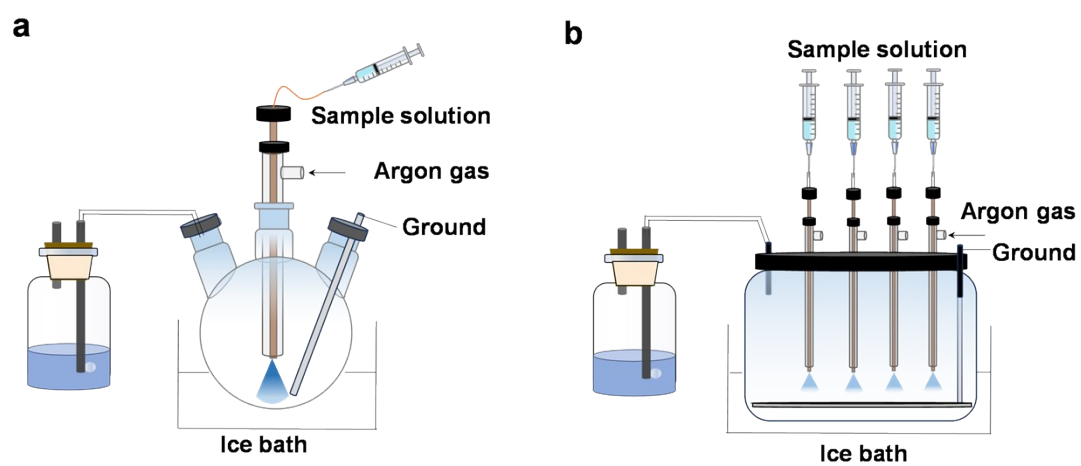

**Figure S1.** Scale-up experimental setup for the N-hydroxylation reaction of N,N-dimethylaniline. (a) Single-channel spray device. (b) Multi-channel spray device.

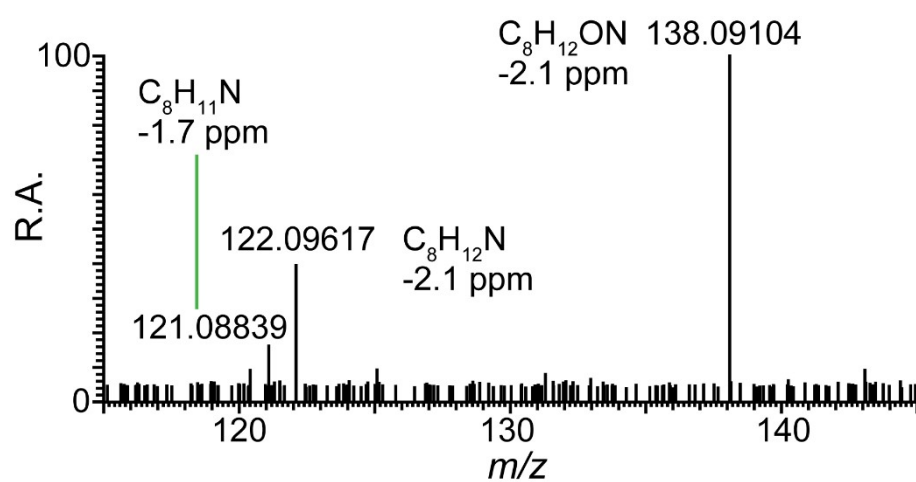

**Figure S2.** High resolution mass spectrum of ionic products when spraying N,N-dimethylaniline water solution. Relative abundance (R.A.).

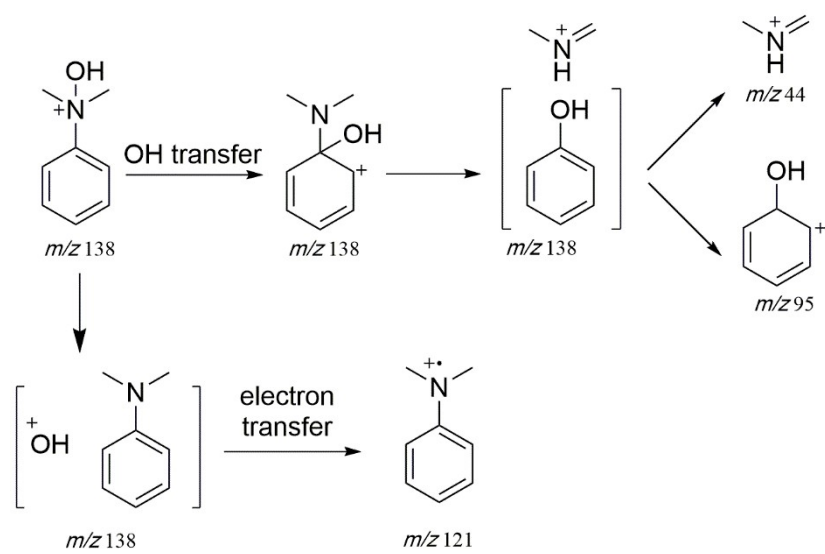

**Figure S3.** The fragmentation process of  $m/z$  44, 95 and 121 in the dissociation of  $m/z$  138.

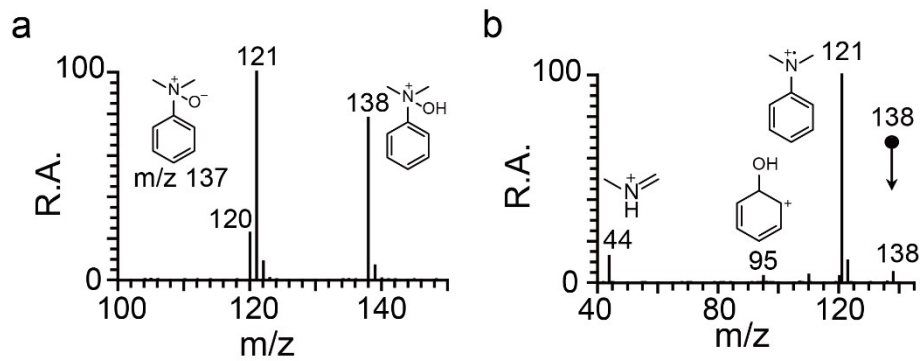

**Figure S4. Mass spectra data for N,N-dimethylaniline N-oxide standard.** (a) Mass spectrum of standard. (b) Tandem mass spectrum of  $m/z$  138. Relative abundance (R.A.).

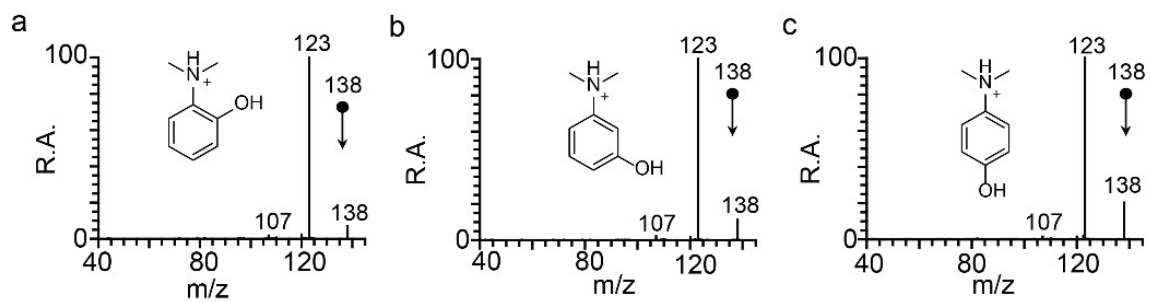

**Figure S5.** Tandem mass spectra of hydroxy-substituted N,N-dimethylaniline standards in benzene ring. (a) 2-hydroxy-N,N-dimethylaniline. (b) 3-hydroxy-N,N-dimethylaniline. (c) 4-hydroxy-N,N-dimethylaniline. Relative abundance (R.A.).

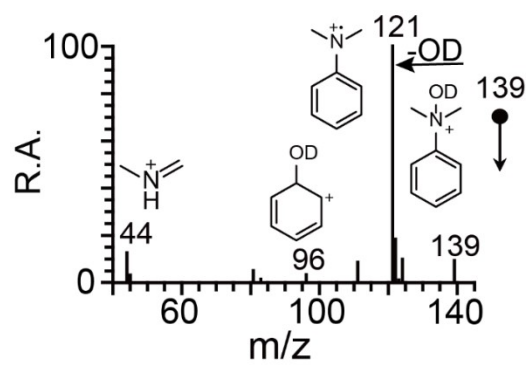

**Figure S6.** Tandem mass spectrum of product ion at  $m/z$  139. Relative abundance (R.A.).

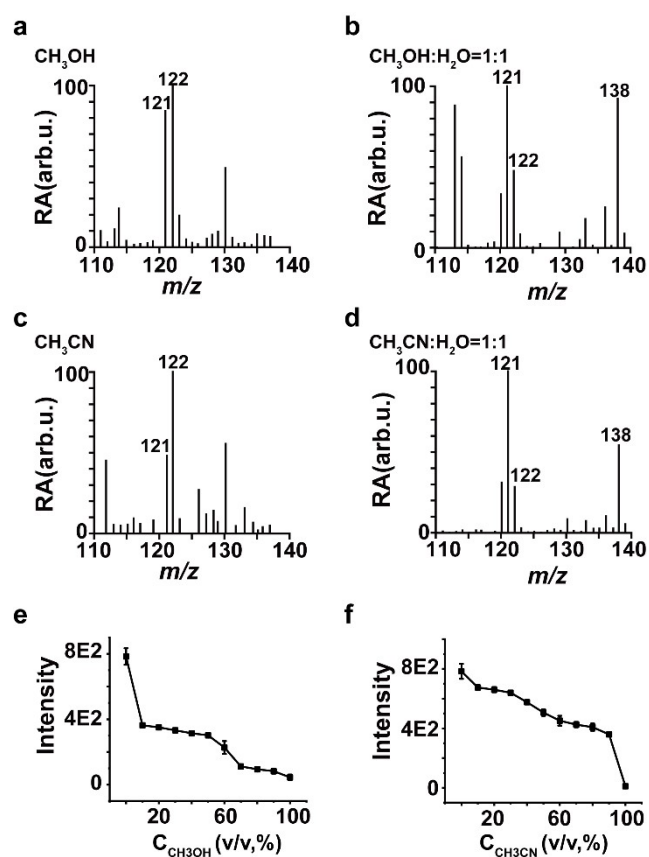

**Figure S7. Effect of different solvents on the intensity of DMA-OH at  $m/z$  138.** (a) Mass spectrum of DMA with  $\text{CH}_3\text{OH}$ . (b) Mass spectrum of DMA with  $\text{CH}_3\text{OH}/\text{H}_2\text{O}$  (1:1). (c) Mass spectrum of DMA with  $\text{CH}_3\text{CN}$ . (d) Mass spectrum of DMA with  $\text{CH}_3\text{CN}/\text{H}_2\text{O}$  (1:1). (e) Intensity of  $m/z$  138 as a function of the concentration of  $\text{CH}_3\text{OH}$ . (f) Intensity of  $m/z$  138 as a function of the concentration of  $\text{CH}_3\text{CN}$ . C: concentration.



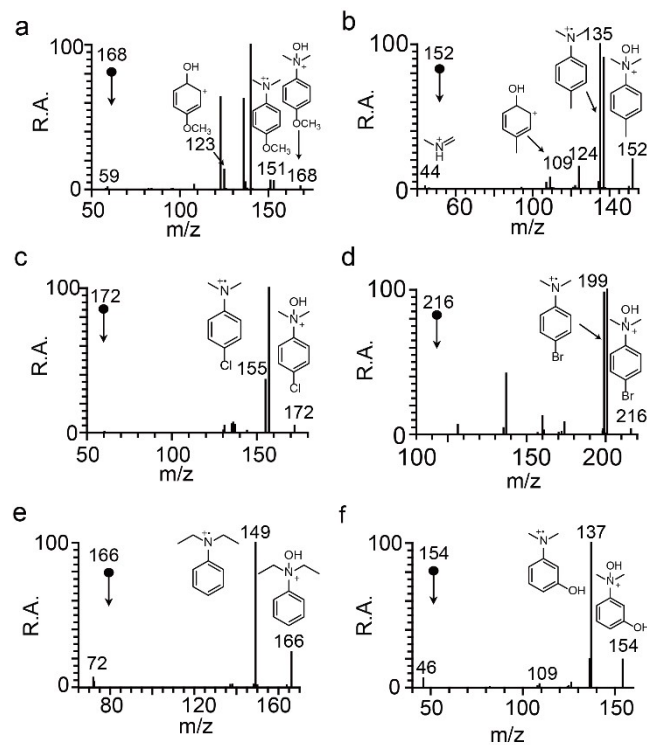

**Figure S8.** Tandem mass spectra of *N*-hydroxylation of DMA derivatives. (a) *N*-hydroxylation of 4-OMe-DMA (mass=151) at  $m/z$  168. (b) *N*-hydroxylation of 4-Me-DMA (mass=135) at  $m/z$  152. (c) *N*-hydroxylation of 4-Cl-DMA (mass=155) at  $m/z$  172. (d) *N*-hydroxylation of 4-Br-DMA (mass=199) at  $m/z$  216. (e) *N*-hydroxylation of DEA (mass=149) at  $m/z$  166. (f) *N*-hydroxylation of 3-OH-DMA (mass=137) at  $m/z$  154. DEA: N,N-diethylaniline. DMA: N,N-dimethylaniline. Relative abundance (R.A.).

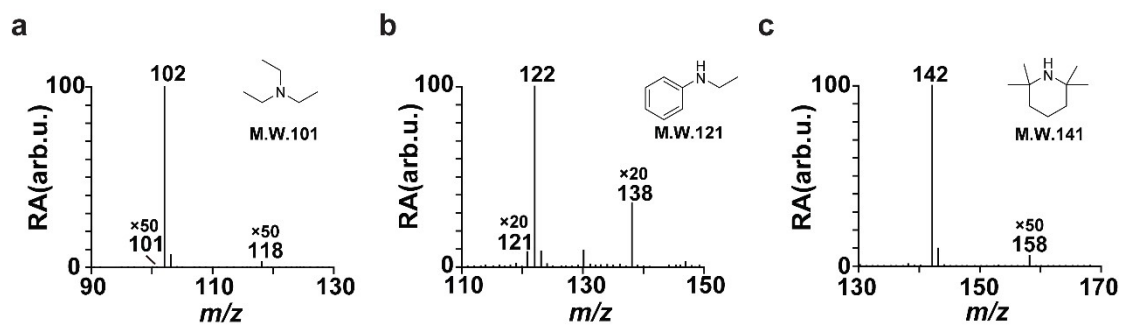

**Figure S9. Reaction scope of the N-hydroxylation reaction of other amines in water microdroplets. (a) Triethylamine. (b) N-Ethylaniline. (c) 2,2,6,6-tetramethylpiperidine.**

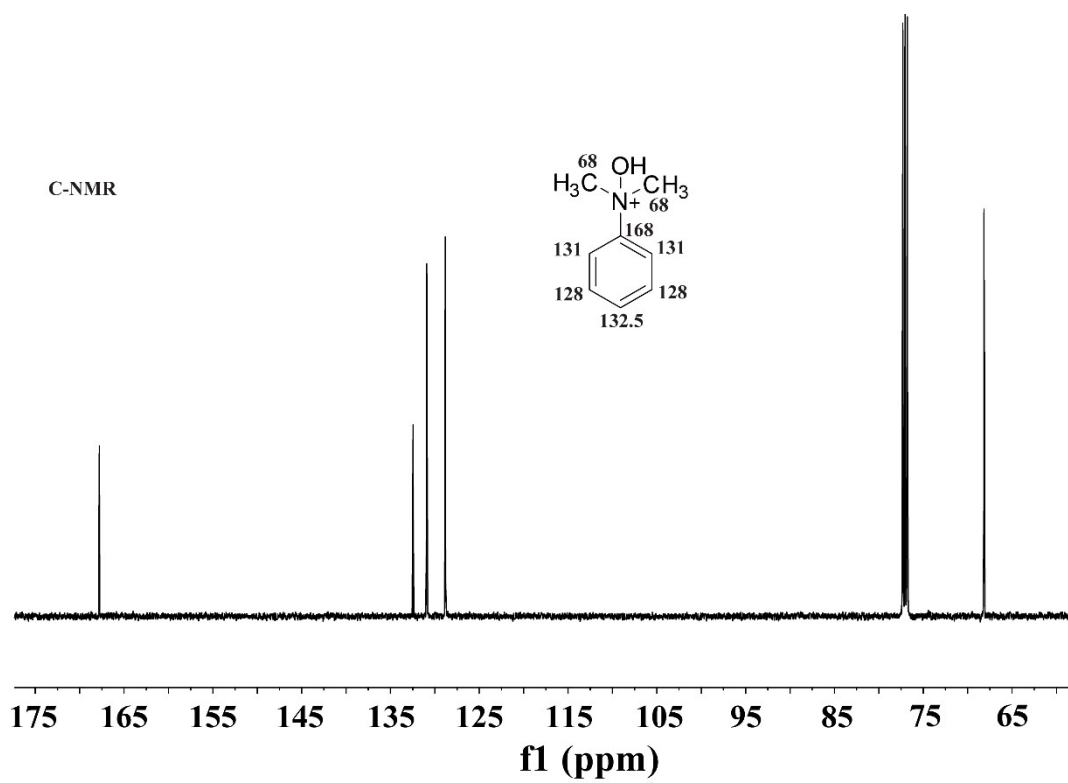

**Figure S10.** <sup>13</sup>C-nuclear magnetic resonance (NMR) spectroscopy of N-hydroxyl-N,N-dimethylanilinium.

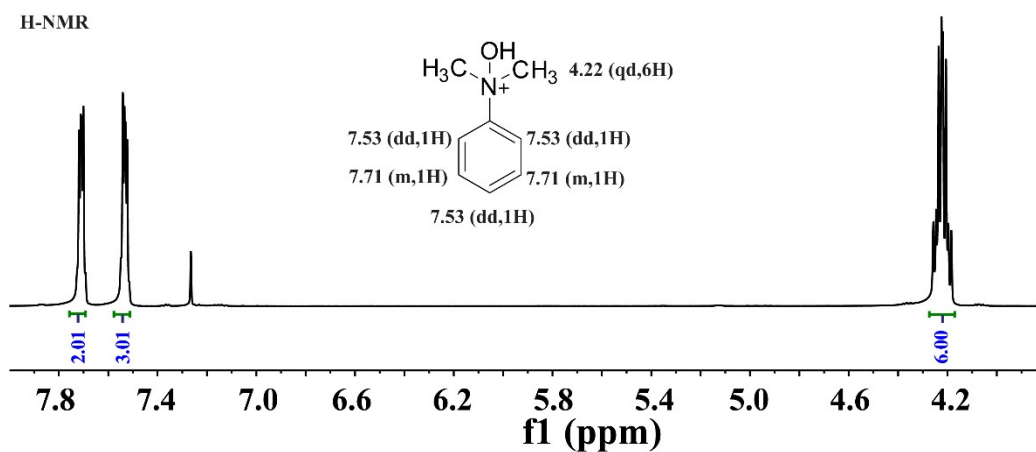

**Figure S11.**  $^1\text{H}$ -nuclear magnetic resonance (NMR) spectroscopy of N-hydroxyl-N,N-dimethylanilinium.

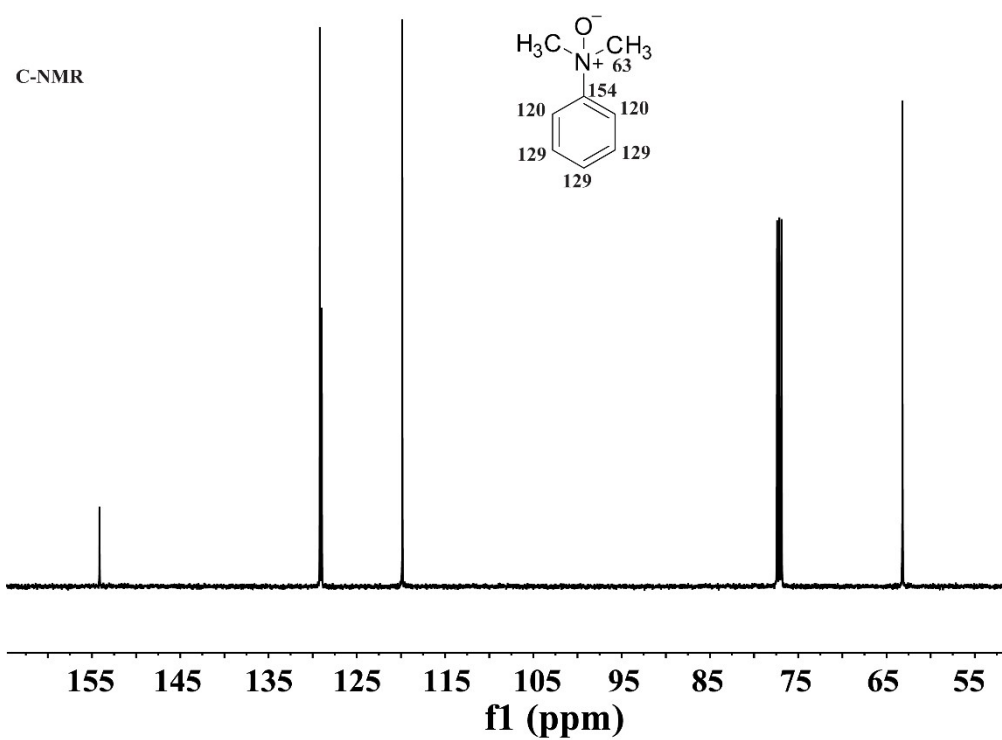

**Figure S12.**  $^{13}\text{C}$ -nuclear magnetic resonance (NMR) spectroscopy of *N,N*-dimethylaniline *N*-oxide standard.

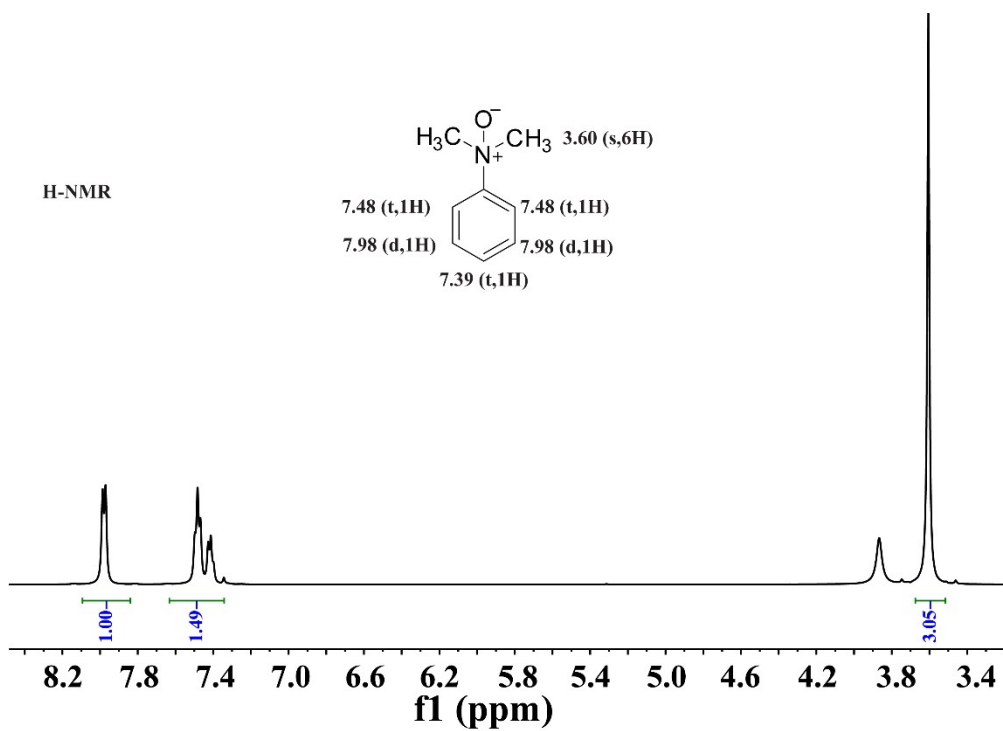

**Figure S13.**  $^1\text{H}$ -nuclear magnetic resonance (NMR) spectroscopy of N,N-dimethylaniline N-oxide standard.

H-NMR

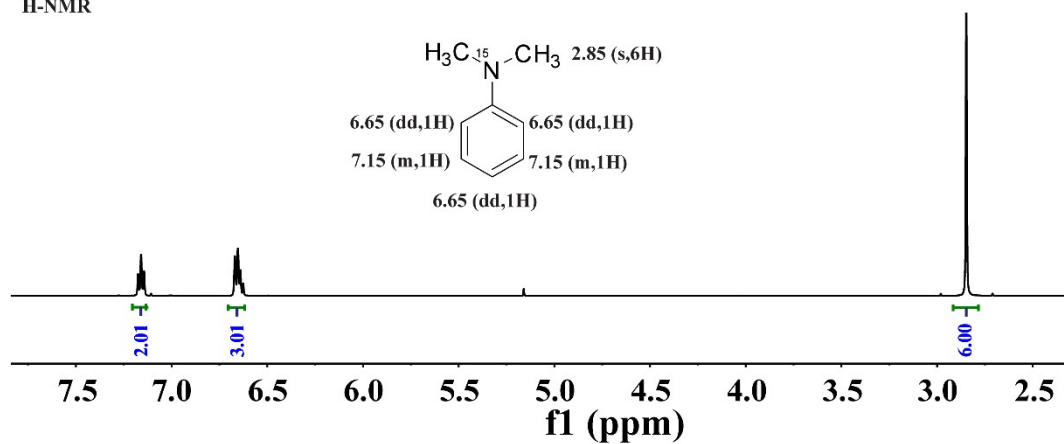

**Figure S14.** <sup>1</sup>H-nuclear magnetic resonance (NMR) spectroscopy of <sup>15</sup>N-DMA. DMA: N,N-dimethylaniline.

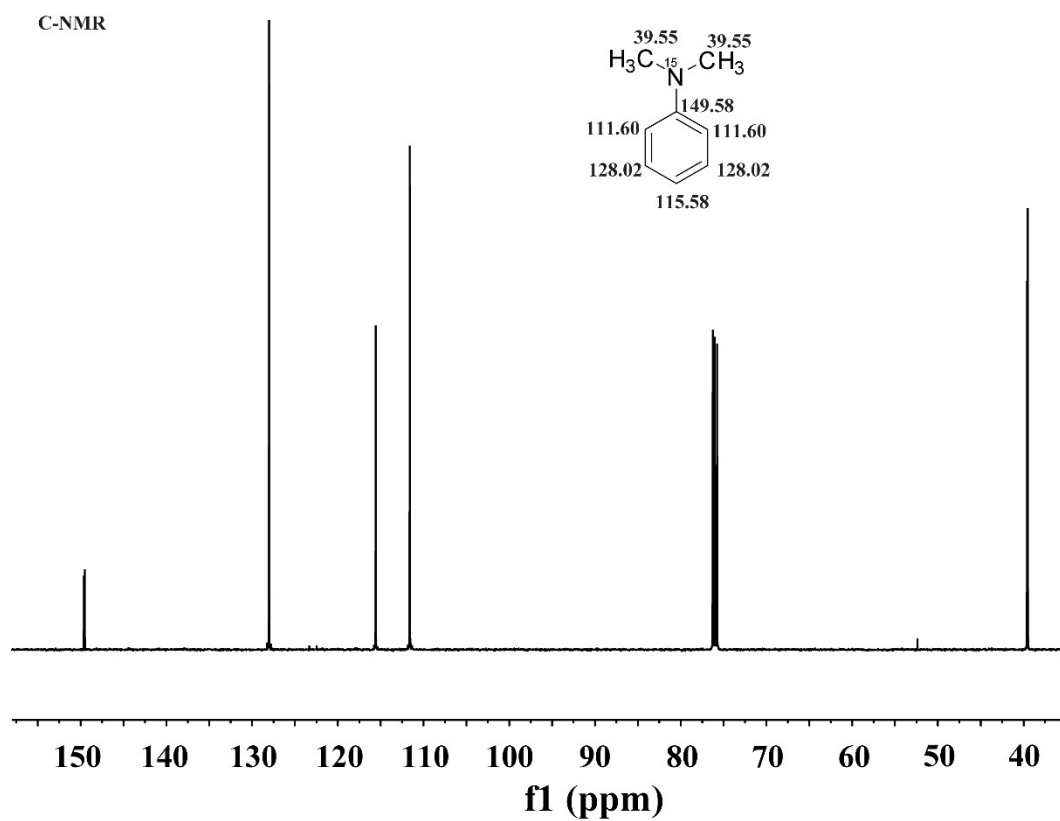

**Figure S15.** <sup>13</sup>C-nuclear magnetic resonance (NMR) spectroscopy of <sup>15</sup>N-DMA. DMA: N,N-dimethylaniline.



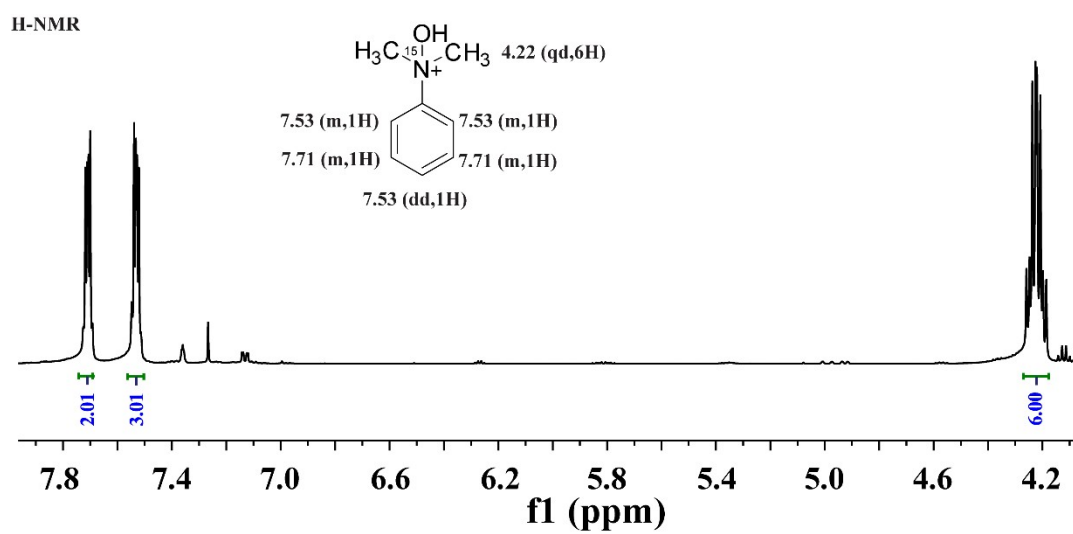

**Figure S16.** <sup>1</sup>H-nuclear magnetic resonance (NMR) spectroscopy of <sup>15</sup>N-DMA-OH<sup>+</sup>. DMA: N,N-dimethylaniline.

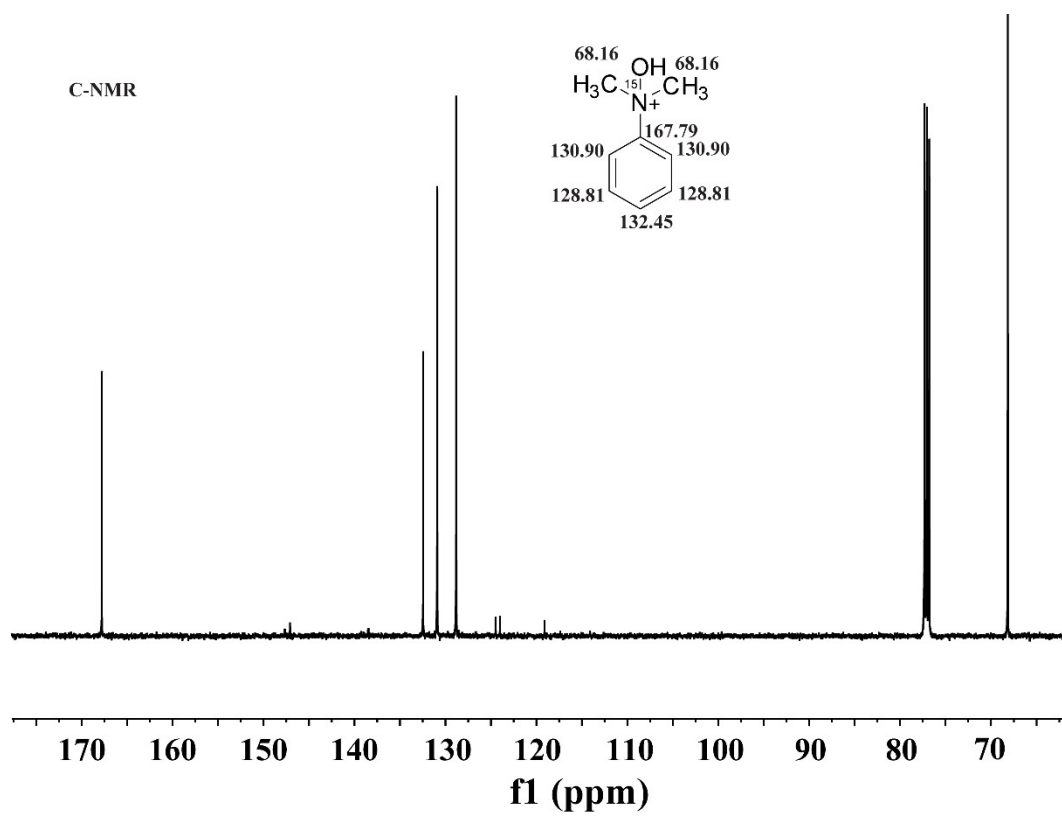

**Figure S17.** <sup>13</sup>C-nuclear magnetic resonance (NMR) spectroscopy of <sup>15</sup>N-DMA-OH<sup>+</sup>. DMA: N,N-dimethylaniline.

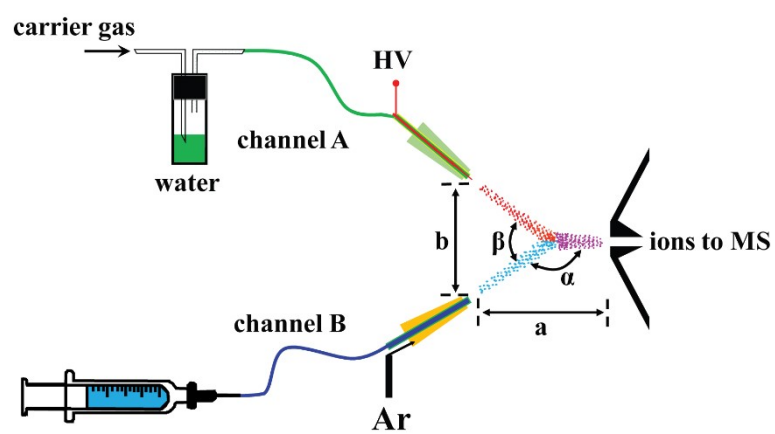

**Figure S18.** Schematic setup of low energy corona discharge ionization mass spectrometry. Ar: argon. MS: mass spectrometry. HV: high voltage.

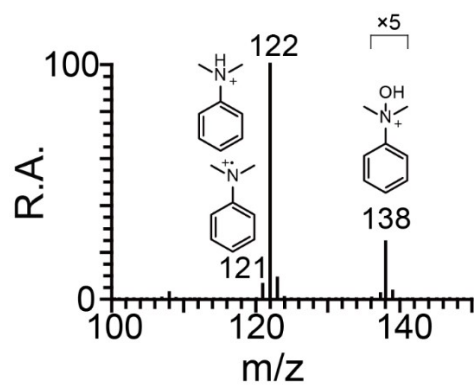

**Figure S19.** Mass spectrum of spraying N,N-dimethylaniline solution by low energy corona discharge ionization mass spectrometry. Relative abundance (R.A.).

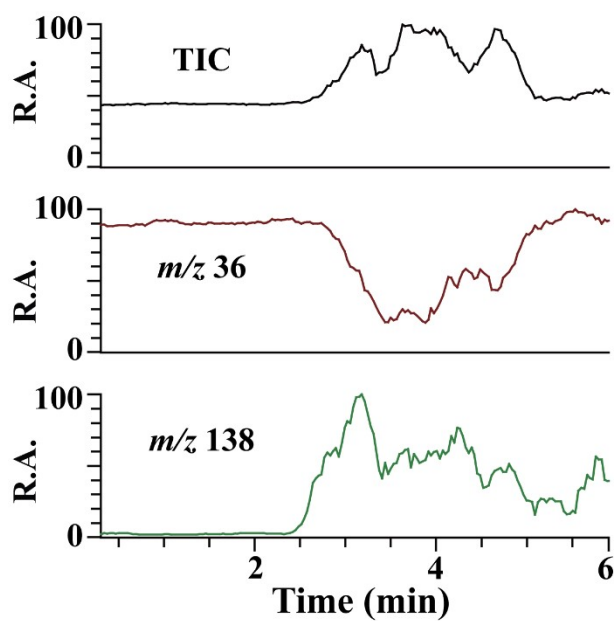

**Figure S20.** Typical total ion chromatogram (TIC) and extracted ion chromatogram showing reactant at  $m/z$  36 and products  $m/z$  138 before and after spraying N,N-dimethylaniline solution by low energy corona discharge ionization mass spectrometry (in Figure S13). Relative abundance (R.A.). Mass-to-charge ( $m/z$ ).
